# Supplementary material
Source: PubMed Central journal article supplement (PMC5846916)
Supplement: jciinsight-2-96783-s002.pdf [file jciinsight-2-96783-s002.pdf]

Supplemental Table S1. Comparison of the amino acid sequences of GPIHBP1, SLURP1, and four Ly6E-like chicken proteins.

| Alignment between Ly6E-like proteins and GPIHBP1 |                                                                      |        | A conserved motif in GPIHBP1 and its absence in the Ly6E-like proteins |                 |
|--------------------------------------------------|----------------------------------------------------------------------|--------|------------------------------------------------------------------------|-----------------|
| 45170                                            | MKTPVI-----LLVAVLCVEQ-----                                           | 17     | Opossum                                                                | YSAWCSDTCQ 131  |
| 39585                                            | MKALLVA-----LLVAVLCAEQ-----                                          | 17     | Tasmanian devil                                                        | FSAWCSDTCK 114  |
| 41621                                            | MKAFLLA-----VLAAVLCVER-----                                          | 17     | Elephant                                                               | YTAWCADDCE 116  |
| 43582                                            | MKASLLV-----VLVIALCTES-----                                          | 17     | Hyrax                                                                  | YTGWCTDECE 108  |
| hu GPIHBP1                                       | MKALGAV-----LLALLLFGRPGR-GQTQQ-EEEEDEDHGPDYDEEDEVVEEETNRLPGG         | 57     | Platypus                                                               | YSMWCADFCE 120  |
| p1 GPIHBP1                                       | MKALMTALLTALLTALLTALFCAAQGVVGKEVGPDRPETEDGEEEDYDDEDL-----EYEAPTDG    | 61     | Dolphin                                                                | YSGWCADTCQ 112  |
|                                                  | **:                                                                  | :* . : | Sheep                                                                  | YSGWCADTCQ 116  |
| 45170                                            | --VYPFMCYVCOQQESNKDCLTISMCAKEDKYCVTVRDNVGTNPDKPKYVISKMCSPTCNATSQQQN  | 82     | Kangaroo rat                                                           | YSMWCTDSCR 113  |
| 39585                                            | --ASSLFCYTCENEHSNWNCLKTYKCEDHEKYCTTTYSAAGFGKD-MGYRITKKCSADCPETNTDFG  | 81     | Shrew                                                                  | YSAWCSDTCH 54   |
| 41621                                            | --AHTLICFSCSDASSNWACLTPVKCAENEHCVTTYVGVGIGGK-SGQSISKGCSPVCPISAGINLG  | 81     | Guinea pig                                                             | YSMWCKDSCQ 114  |
| 43582                                            | --AFSLRCFSCKDAPSNIHCFSTTTCADHEKYCLTTYSTKGLGDD-RQOSITKKCAAFCPISIDLNIG | 81     | Mouse                                                                  | YSMWCTDTCQ 114  |
| hu GPIHBP1                                       | RSRVLLRCYTCCKSLPRDERCNLTQNC-SHGQCTTTLIAHGNT-ESGLLTHSTWCTDSCQPITKTVE  | 122    | Rat                                                                    | YSMWCTDTCQ 122  |
| p1 GPIHBP1                                       | KRGGELRCYTCESQFSKEFCCLNDTPCPSSSNYCKTLISSGLT-DSGHLTTYSMWCADFCEPLTKTVH | 164    | Hedgehog                                                               | YSAWCSDTCQ 109  |
|                                                  | : * : * . . * * : * * . : * : *                                      |        | Squirrel                                                               | YSMWCVDTCCQ 123 |
| 45170                                            | QAHRNVSCEKPLCN 97                                                    |        | Horse                                                                  | YSAWCADMCCQ 115 |
| 39585                                            | VVAISTKCKTSLCN 96                                                    |        | Dog                                                                    | YSAWCADACK 114  |
| 41621                                            | IAAASVYCCDSFLCN 96                                                   |        | Panda                                                                  | YSAWCADACQ 115  |
| 43582                                            | IAGLATSCCQTSCLCN 96                                                  |        | Cat                                                                    | YSTWCADTCQ 73   |
| hu GPIHBP1                                       | GTQVTMTCCQSSLCN 137                                                  |        | Ferret                                                                 | YSVWCTDTCH 112  |
| p1 GPIHBP1                                       | GTFFMVSCCSSSLCG 179                                                  |        | Lesser hdg tenrc                                                       | FSTWCTDACE 55   |
|                                                  | . **.. **.                                                           |        | Marmoset                                                               | HSTWCADSCQ 113  |
|                                                  |                                                                      |        | Macaque                                                                | HSAWCTDNCQ 115  |
|                                                  |                                                                      |        | Olive baboon                                                           | HSAWCTDNCQ 115  |
|                                                  |                                                                      |        | Vervet-AGM                                                             | HSAWCTDNCQ 117  |
|                                                  |                                                                      |        | Gibbon                                                                 | HSTWCADSCQ 115  |
|                                                  |                                                                      |        | Chimpanzee                                                             | HSTWCTDSCQ 78   |
|                                                  |                                                                      |        | Orangutan                                                              | HSTWCADSCQ 115  |
|                                                  |                                                                      |        | Gorilla                                                                | HSTWCTDSCQ 115  |
|                                                  |                                                                      |        | Human                                                                  | HSTWCTDSCQ 115  |
|                                                  |                                                                      |        | Bushbaby                                                               | YSMWCADSCK 119  |
|                                                  |                                                                      |        | Mouse-lemur                                                            | YSTWCADSCQ 110  |
|                                                  |                                                                      |        |                                                                        | .. ** * * .     |
|                                                  |                                                                      |        | 45170                                                                  | ISKMCSPTCN 76   |
|                                                  |                                                                      |        | 39585                                                                  | ITKKCSADCP 75   |
|                                                  |                                                                      |        | 41621                                                                  | ISKGCSPVCP 75   |
|                                                  |                                                                      |        | 43582                                                                  | ITKKCAAFCP 75   |
|                                                  |                                                                      |        | hu SLURP1                                                              | VTRSCESSCV 78   |
| Alignment between Ly6E-like proteins and SLURP1  |                                                                      |        |                                                                        |                 |
| hu SLURP1                                        | MASRWAVQLLLVAAWSMGCGEALKCYTCKEPMTSASCRTITRCKPEDTACMTTLVTVAEYFPNQSP   | 67     |                                                                        |                 |
| 45170                                            | --MKTPVILLVAVLCVEQVYPFMCYVCOQQESNKDCLTISMCAKEDKYCVTVRDNVGTNPDKPKY    | 64     |                                                                        |                 |
| 39585                                            | --MKALLVALLVAVLCAEQASSLFCYTCENEHSNWNCLKTYKCEDHEKYCTTTYSAAGFGKD--MGY  | 63     |                                                                        |                 |
| 41621                                            | --MKAFLLAFLVAVLCVERAHTLICFSCSDASSNWACLTPVKCAENEHCVTTYVGVGIGGK--SGQ   | 63     |                                                                        |                 |
| 43582                                            | --MKASLLVVLVIALCTESAFSLRCFSCKDAPSNIHCFSTTTCADHEKYCLTTYSTKGLGDD--RQQ  | 63     |                                                                        |                 |
|                                                  | : : * . . . : * : * . : . * . * . : * * .                            |        |                                                                        |                 |
| hu SLURP1                                        | VVTRSCSSSCVATDPDSIGAAHLIFCCFRDLCN 100                                |        |                                                                        |                 |
| 45170                                            | VISKMCSPTCNATSQQQNQAHRNVSCEKPLCN 97                                  |        |                                                                        |                 |
| 39585                                            | RITKKCSADCPETNTDFGVVAISTKCKTSLCN 96                                  |        |                                                                        |                 |
| 41621                                            | SISKGCSPVCPISAGINLGIAAASVYCCDSFLCN 96                                |        |                                                                        |                 |
| 43582                                            | SITKKCAAFCPISIDLNIGIAGLATSCCQTSCLCN 96                               |        |                                                                        |                 |
|                                                  | ::: * : * . : . ** ***                                               |        |                                                                        |                 |

Alignment between Ly6E-like proteins and GPIHBP1. CLUSTAL O (1.2.4) multiple amino acid sequence alignment showing little similarity (aside from the cysteine residues in the Ly6 structural motif) between ENSGALG00000041621, ENSGALG00000043582, ENSGALG00000039585,

ENSGALG00000045170, human (hu) GPIHBP1, and platypus (pl) GPIHBP1. The residues comprising the acidic domain of GPIHBP1 are in *blue*; cysteine residues are in *green*.

**Alignment between Ly6E-like proteins and SLURP1.** CLUSTAL O (1.2.4) multiple amino acid sequence alignment showing little similarity (aside from the cysteine residues of the Ly6 structural motif) between ENSGALG00000041621, ENSGALG00000043582, ENSGALG00000039585, ENSGALG00000045170, and human SLURP1.

**A conserved motif in GPIHBP1 and its absence in the Ly6E-like proteins.** CLUSTAL O (1.2.4) multiple amino acid sequence alignment of GPIHBP1, revealing conservation of W109 (orange) and D112 (blue) in 31 mammalian species. These two residues are not found in the corresponding regions of ENSGALG00000041621, ENSGALG00000043582, ENSGALG00000039585, ENSGALG00000045170, and human SLURP1. \* Conserved residue; : amino acids of similar properties; . amino acids with weakly similar properties. Lesser hdg tenrc, lesser hedgehog tenrec; vervet-AGM, African green monkey.

**Supplemental Table S2. Amino acid sequence alignment of platypus GPIHBP1 against 14 chicken Ly6 proteins.**

|                                                         |                                                                                                                                 |
|---------------------------------------------------------|---------------------------------------------------------------------------------------------------------------------------------|
| PSCA (ENSGALG0000045875); identity to GPIHBP1 = 27.0%   |                                                                                                                                 |
| GPIHBP1                                                 | MKALMTALLTALLTALLTALFCAAQGVVKEVGPDRPETEDGEEEEYDDEDLEYEAPTDGKRGGELRCYTCESQFSKEFCLNDTPCPSSSNYCKTLISSGLTDSGHLTTYSMWCADFCE<br>120   |
| PSCA                                                    | -----MKVFFILLLAAI-----LCTDPGSSLQCYCKTKLSNSNCQATMNCKENE-MCKTDVI---RVIGFFSIISKGCEASCQ<br>70                                       |
|                                                         | :...: **:* . *..**:*...:*. * * ... *** : *..: * * *:                                                                            |
| GPIHBP1                                                 | PLTKTVHGTFFMVSCCSSSLCGADSLDRKEERDGAADVAGGSLAALGASVLLGLLGAGL 179                                                                 |
| PSCA                                                    | EDYQDFKVGNRNVSCCSTNLCNVNAAGSVRSSYGMA-----AGISASLLWTFLLNRL 122                                                                   |
|                                                         | : : *****:***...: . .. * * *..**:* :*. *                                                                                        |
| SLURP1 (ENSGALG0000046632); identity to GPIHBP1 = 26.8% |                                                                                                                                 |
| GPIHBP1                                                 | MKALMTALLTALLTALLTALFCAAQGVVKEVGPDRPETEDGEEEEYDDEDLEYEAPTD-----GKRGGELRCYTCESQFSKEFCLNDTPCPSSSNYCKTLISSGLTD---SGHLT<br>109      |
| SLURP1                                                  | -----MKMPLVGLLLGLACIELAQSLQCYTCKEPTDISKCRTPTECPPKAKVCTTTLHSDLDGYPFFGNVT<br>66                                                   |
|                                                         | : * : . .*:***:. . . * . * ** :*: * . *::*                                                                                      |
| GPIHBP1                                                 | TYSMWCADFCEPLTKTVHGTFFMVSCCSSSLCGADSLDRKEERDGAADVAGGSLAALGASVLLGLLGAGL 179                                                      |
| SLURP1                                                  | -VTRSCEEECI--TYDGIGSNRPTSCCYTDLCSDDTKSSKGERSSSAALG--VMAMVFTLLQGVL---- 127                                                       |
|                                                         | : * : * * * : .*** :***. * : . * **..**:. :* : :*: *:*                                                                          |
| LYPD2 (ENSGALG0000035166); identity to GPIHBP1 = 22.7%  |                                                                                                                                 |
| GPIHBP1                                                 | MKALMTALLTALLTALLTALFCAAQGVVKEVGPDRPETEDGEEEEYDDEDLEYEAPTDGKRGGELRCYTCESQFSKEFCLNDTPCPSSSNYCKTLISSGL--TDSGHLTTYSMWCADFCE<br>118 |
| LYPD2                                                   | -----MKTTWGSGLATQIPIVIGNKGEVAQSLKCYTCHEPTASEKCMKIQKCAKNETMCKTTMYSLEEVYPFVGLSTVTMKCSSV<br>81                                     |
|                                                         | . ..: :. .*: . .*:***.. :.* **:* * .... *** : * **:* : *:. .                                                                    |
| GPIHBP1                                                 | CEPLTKTVHGTFFMVSCCSSSLCGADSLDRKEERDGAADVAGGSLAALGASVLLGLLGAGL 179                                                               |
| LYPD2                                                   | CSPSDVDGIGMTRPVSCCYSNLCNIDGAASLRKITFF-----PLLVWLIILN----- 128                                                                   |
|                                                         | *.* * ***** *..* . : * . :*:                                                                                                    |
| ENSGALG0000041621; identity to GPIHBP1 = 25.4%          |                                                                                                                                 |
| GPIHBP1                                                 | MKALMTALLTALLTALLTALFCAAQGVVKEVGPDRPETEDGEEEEYDDEDLEYEAPTDGKRGGELRCYTCESQFSKEFCLNDTPCPSSSNYCKTLIS-SGLTDSGHLTTYSMWCADFCE<br>119  |
| 41621                                                   | MK-----AFLLAVLAAVLC-----VERAHTLICFSCSDASSNWACLTPVKAENEHCVTYVGVGIGG-KSQSISKGCSPVC<br>73                                          |
|                                                         | ** **: *:* *:*:*:* :*. * *:*:*.. * : ** . * .....* * * : . : * * : .*                                                           |
| GPIHBP1                                                 | EPLTKTVHGTFFMVSCCSSSLCGADSLDRKEERDGAADVAGGSLAALGASVLLGLLGAGL----- 179                                                           |
| 41621                                                   | PSAGINLGIAAASVYCCDSFLCNISGSSSVKAS-----YAV----LALGILVSVFYVLRARE 126                                                              |
|                                                         | : : * **.* ** . . . : * : **:* : :                                                                                              |

ENSGALG0000043582; identity to GPIHBP1 = 27.8%  
GPIHBP1 MKALMTALLTALLTALLTALFCAAQGVVKEVGPDRPETEDGEEEEYDDEDLEYEAPTGKRGGELRCYTCESQFSKEFCLNDTPCPSSSNYCKTLISSGLTDSGHLTTYSMWCADFCE  
120  
43582 MKA-----SLL-----VVLVIALCTESAFSLRCFSCKDAPSNHCFSTTTCADHEKYCLTTYSTKGLGDDRQOSITKKCAAFCP  
74  
\*\*\* :\*\* : : .\*\*\*:\*. \* : .\*: \* \* . :\*\* \* \* : . . : : \* \* \*\*  
GPIHBP1 PLTKTVHGTFFMVSCCSSSLCGADSLDRKEERDGAADVAGGSLAALGASVLLGLLGAGL 179  
43582 SIDLNIGIAGLATSCCQTSLCNIGASSVKT--SYTVIAVGVLASLACILRLGL----- 126  
: .: : : .\*\*\*:\*\*\*. . . : . :.\* \* \*\*:\*.. : \*\*\*

ENSGALG0000039585; identity to GPIHBP1 = 23.4%  
GPIHBP1 MKALMTALLTALLTALLTALFCAAQGVVKEVGPDRPETEDGEEEEYDDEDLEYEAPTGKRGGELRCYTCESQFSKEFCLNDTPCPSSSNYCKTLISSGLTDSGHLTTYSMWCADFCE  
120  
39585 -----MKALLVALLVAVLCA-----EQASSLFCYTCENEHSNWNCLKTYKCEDHEKYCTTTYSAAGFGKDMGYRITKKCSADCP  
74  
: .\*\*\*.\*\*\*.\*:\*\*\* :...\* \*\*\*\*\*:.\* \*\* : \* . :\*\*\*.\* \*: . . . : \* : \*  
GPIHBP1 PLTKTVHGTFFMVSCCSSSLCGADSLDRKEERDGAADVAGGSLAALGASVLLGLLGAGL----- 179  
39585 ETNTDFGVVAISTKCKTSLCNFSGANSVKLSYA-VMFLGT-----CLGVLSWLPFSIDSIASSSRKTLHKDTCSD 145  
. . . : .\*\*\*:\*\*\*. . . : . . . \* \*\*:\* . :

ENSGALG0000045170; identity to GPIHBP1 = 26.0%  
GPIHBP1 MKALMTALLTALLTALLTALFCAAQGVVKEVGPDRPETEDGEEEEYDDEDLEYEAPTGKRGGELRCYTCESQFSKEFCLNDTPCPSSSNYCKTLISSGLTDS-GHLTTYSMWCADFC  
119  
45170 MK-----TTPVILLVAVL-----CVEQVYPFCYVCQQQESNKDCLTISMCAKEDKYCVTVRDNVGTNPDKPKYVISKMCSPTC  
74  
\*\* : . \*\*.\*: : : \*\*.\*:\* \*: \* : \* . . :\*\* \* : . \* : \* \* : \*  
GPIHBP1 EPLTKTVHGTFFMVSCCSSSLCGADSLDRKEERDGAADVAGGSLAALGASVLLGLLGAGL 179  
45170 NATSQQQNAHRNVSCCEKPLCNVNGGSSKQGSYGAMFL--GVLASITYIF----ACGR 127  
: :: : :. \*\*\*\*..\*\*... : \* : \* \* : \* \* : . . \*

LYPD6B (ENSGALG0000028759); identity to GPIHBP1 = 23.1%  
GPIHBP1 MKALMTALLTALLTALLTALFCAAQGVVKEVGPDRPETEDGEEEEYDDEDLEYEAPT-DGKRGGELRCYTCESQFSKEFC---LNDTPCPSSSNYCKTLISSGLTDSGHLTTYSMWCA  
116  
LYPD6B ----MLLFCHTLVGAFLEFLLSGNWVSAKNIN-----FYN-----VRPPLDPTFPNSFKCFTCDNAVDNYNCNRWAEDRWCESTQYCLTVHL--FTDHGKSTSVTKKCA  
96  
\* : :\*: \* : : : \* .\*:. : \* . \* . . :\*:\*\*\*. . . : \* : \* \*\*.\*:\*\*\* \* : :\*\* \* : \* : \*  
GPIHBP1 D--FCE---PLTKTVHGTFFMVSCCSSSLCGADSLDRKEERD---GAAAVAGGSLAALGASVLLGLLGAGL- 179  
LYPD6B TGDECHFVGCHHRESGHTTECVSCCEGMICNVEIPTNHTNAVFAVLHARRTSGGSRRTVSIAVLVSVMIALS 169  
. : \* : \* \*\*\*\*..\*:. . : \* .:\*\*\* :. :\*\*\*:\*\*\* . \*

LYPD1 (ENSGALG0000012176); identity to GPIHBP1 = 18.3%

GPIHBP1 MKALMTALLTALLTALLTALFCAAQGVVGVGKEVGPDRPETEDGEEEEYDDEDLEYEAPTGKRGGELRCYTCESQFSKEFCLNDTP---CP-SSSNYCKTLISSGLTDSGHLTTY----  
 112  
 LYPD1 -----RMRLFLLAATFCGLCL-----APGFGQLIQCYQCEEFQLNNDCSSPEFIVNCTVNVQDMCQKE----VMEKSFQIMYRKSCA  
 73  
 : \*\*:\* \*\* . \* : : \*\* \*\* . : : \* . \* . . : \* : . : : . . . \*

GPIHBP1 -----MWCADFCEPLTKTVHGTFFMVSCSSSLCGADSLDRKEERDGAADVAGGSLAALGASVLLGLLGAGL----- 179  
 LYPD1 SSAACLIASAGYQSFCSQPK----VNSVICISCCNTPLCNGPRPKKRGNS-GV--MLRAHM--ITTALL---LEFSLFLFLYC 142  
 .\*\*.\* . . :\*\*\*.:\*\*.. . : : \* . : . : : : : \* \* . \*

ENSGALG0000033369; identity to GPIHBP1 = 19.4%

GPIHBP1 MKALMTALLTALLTALLTALFCAAQGVVGVGKEVGPDRPETEDGEEEEYDDEDLEYEAPTGKRGGELRCYTCESQFSKEFCLNDTPCPSSSNYCKTLISSGLTDSGHLTTYSMWCADFCE  
 120  
 33369 -----MLS-----G-----HMPGGAHG----ILSLMTVVFVL----PEVSGLQCYGCNIIIVGTYKVDTGCSNPEV-----ITCSHS-----HQGFKHFRCI  
 68  
 :\* : \* . \* . \* . : : . . \* : \*\* \* : . . . : . . \* . \* : . . : : \*\*

GPIHBP1 PLTKTVHGTFF-----MVSCSSSLCGADSLDRKEERDGAADVAGGSLAA--LGASVLLGLLGAGL 179  
 33369 KTESVVLGILLTSGCATSRHCQQQELPGVRIHCCDIDLNGSPQPPP-----SLAGGCLLLPSLLAALLLS----- 134  
 ..\* \* : : : \*\*\*.:\*\*.. . : : \* . : . : : : : \* \* : : \*\*.

LYPD6 (ENSGALG0000012470); identity to GPIHBP1 = 20.1%

GPIHBP1 MKALMTALLTALLTALLTALFCAAQGVVGVGKEVGPDRPETEDGEEEEYDDEDLEYEAPTGKRGGELRCYTCESQFSKEFC---LNDTPCPSSSNYCKTLISSGLTDSGHLTTYSMWCAD  
 117  
 LYPD6 MA-SQRLAHVLLL-----GLVAG-----WLRQAQRDFTVKDIVYLHPSTTPFPHGFKCFTCERAADNYECNRWAPDYCPRGTRYCFSQHMMRVGTGES-----VSVTK  
 94  
 \* \* .\*\* \*\* : . : \* : : \* \* : : : \*\*\* . : \* \* . \*\* . : \*\* : : \* . . : : .

GPIHBP1 FCEPLTKTV-----HG-TFFMVSCSSSLCGADSLDRKEERD-----GAAAVAGGSLAALGASVLLGLLGAGL 179  
 LYPD6 RCVPLEDCLSTGCTYVKHEEYKICTSCEGTICNLPNPNASDAVFTTSLPLSSTPGL-SGRAVLTAVCLLLGLMA--- 169  
 \* \*\* . : \* : .\*\*\*.:\*\*.. . : : \* . : . : : : : \* \* : : \*\*.

ENSGALG0000026884; identity to GPIHBP1 = 12.0%

GPIHBP1 -----MKALMTALLTALLTALLTALFCAAQGVVGVGKEVGPDRPETEDGE-----  
 43  
 26884 MCSVLPVLIGALPNLRLPQLPLPQVADTSRSILLKPLWYIELCLARFGSSLYLQISIMKFLGFSFLLTFLDSATMLQCEVCHSIGRSCSGHL-ETCSGNADTCGIIHEVTIGMAIPS  
 119  
 \*\* : : : \* \* \* . :\* . . . \*\* .\* :

GPIHBP1 -----EEEDYDDE-----DLEYEAPTGKRGGELRCYTCESQFSKEFCLNDTPCPSSSNYCKTLISSGLTDSGHLTTYSMWCADFCEPLTKTVHGTFFMV  
 133  
 26884 SIKTCVPSTVCQMGPVMTMNYGKVKARSHLACCVGDACRTASVSLPENNVNPNFQCPACYSVDSFQCHNETVNTGSENQCVDLA--GLMNTGGLTVKA-----AMK  
 219  
 :\*.. . . \* : : . : \* : \* \* : : . \* . \* \* \* \*\* : \* \*\* . :

GPIHBP1 SCCSSSLCGADSLDRKEERDGAADVAGGSLAALGASVLLGLLGAGL----- 179  
 26884 GCTTISECSVAGDGKN--NLGVMDIKIKRY-QCHPPTLEMLSSGLVSPQSLFFPALSGFILEKLLF 283  
 .\* : \* \* . . : : . \* . : . \* : \*\*.

|                                                        |                                                                                                                                                           |
|--------------------------------------------------------|-----------------------------------------------------------------------------------------------------------------------------------------------------------|
| HEP21 (ENSGALG0000000115); identity to GPIHBP1 = 23.4% |                                                                                                                                                           |
| GPIHBP1                                                | MKALMTALLTALLTALLTALFCAAQGV---VGKEVGPDRPETEDGEEEEYDDEDLEYEAPTDGKRGGELRCYTCESQFSKEFCLNDTPCPSSSNYCKTLISSGLTDSGHLTTYSMWCA<br>116                             |
| HEP21                                                  | MKLLFVGLALVLCVGVVEALQCKVKYKIPYVGCFHGANETT CER-----RERCAI IKTSLGKVTLYYQQGCTSALN-----CGRE-----<br>76                                                        |
|                                                        | ** *:. .* . * . : : ** * .                    ** * :. *                    . ** : : . . *                    : * * : *                    . *             |
| GPIHBP1                                                | DFCEPLTKTVHGTTFFMVSCSSSLCGADSLDRKEERDAAA VAGGSLAALGASVLLGLLGAGL 179                                                                                       |
| HEP21                                                  | ----RASDAESRLTSRYSCCETDLCNEKWDDDDPTD----- 107                                                                                                             |
|                                                        | :. :                    ***. : . ** .                    *                    :                                                                           |
| CD59 (ENSGALG00000040371); identity to GPIHBP1 = 27.7% |                                                                                                                                                           |
| GPIHBP1                                                | MKALMTALLTALLTALLTALFCAAQGVVGKEVGPDRPETEDGEEEEYDDEDLEYEAPTDGKRGGELRCYTCESQFSKEFCLNDTPCPSSSNYCKTLISSGLTDSGHLTTYSMWCA<br>120                                |
| CD59                                                   | ----MIKMNCVLLTACI-----VLLAFSSSGYALKCYHCENS--PSLCKTNSTCLSNEDTCLQMR-----FGKLR TSSCWKLSQCN<br>70                                                             |
|                                                        | * : . **** :                    : . . * * : ** * . .                    . : * . : : * * . : : *                    :                    * : * * * * . * : |
| GPIHBP1                                                | PLTKTV--HGTTFFMVSCSSSLCGADSLDRKEERDAAA VAGGSLAALGASVLLGLLGAGL 179                                                                                         |
| CD59                                                   | VNDIAVFYQLDNFDYFCCQDLCNEGAVTGVNKA AF-----SIAPVMAM-LWMLL----- 119                                                                                          |
|                                                        | : * :                    *                    ** . . . ** .                    . : :                    : :                    * : * : * * **             |

This table shows CLUSTAL O (1.2.4) amino acid sequence alignment of platypus GPIHBP1 (ENSOANG0000009983) against 14 chicken Ly6 proteins in the Ensembl and Uniprot databases. \* Conserved residue; : amino acids of similar properties; . amino acids with weakly similar properties.

**Supplemental Table S3.** CLUSTAL O (1.2.4) multiple amino-acid sequence alignment covering the carboxyl-terminal end of the LPL in a variety of avian species, platypus, mouse, and human.

|                    | 435                                                                                             | 448 | Gene ID            |
|--------------------|-------------------------------------------------------------------------------------------------|-----|--------------------|
| Kea                | FVKCLEQPV <b>K</b> RKRGG <b>T</b> KQASKENSAHESA                                                 | 462 | Nno_R011707        |
| Zebra finch        | FVKC <b>S</b> EQP <b>A</b> NRKRGG <b>T</b> KKASKENSAHESA                                        | 462 | ENSTGUG00000000287 |
| African ostrich    | FVKCLEQPVNRKRGGAKKASKENSAHESA                                                                   | 462 | Sca_R002339        |
| Chicken            | FVKCLEQPV <b>S</b> RKRGGAKKASKENSAHESA                                                          | 490 | ENSGALG00000015425 |
| Brown roatelo      | FVKCLEQPVN <b>K</b> KRGGAKKASKENSAHESA                                                          | 462 | Mun_R009276        |
| Annas hummingbird  | FVKC <b>L</b> DQPVN <b>T</b> KKGGAKKAS <b>R</b> ENSAHESA                                        | 460 | Aan_R005563        |
| American crow      | FVKC <b>S</b> EQPVNRKR <b>A</b> G <b>T</b> KKASKENSAHESA                                        | 462 | Cbr_R012597        |
| Rifleman           | FVKCLEQPVN <b>K</b> K <b>R</b> EGAKKASKENSAHESA                                                 | 462 | Ach_R005439        |
| Barn owl           | FVKCLEQPVNRKRGGAKKASKENSAHESA                                                                   | 459 | Tal_R012814        |
| White-tailed eagle | FVKC <b>A</b> D <b>E</b> FPVNRKRGGAKKASKENSA <b>D</b> ESA                                       | 462 | Hal_R007162        |
| Royal crane        | FVKCLEQ <b>P</b> I <b>H</b> RKRGGAKKASKENSA <b>L</b> ESA                                        | 462 | Bre_R010180        |
| Houbara bustard    | FVKCLEQPVNRKRGGAKKASKENSAHESA                                                                   | 462 | Cun_R002946        |
| Great cormorant    | FVKCLEQPVNRKRGGAKKASKENSA <b>Y</b> ESA                                                          | 462 | Pca_R011895        |
| Red-legged seriema | FVKCLEQPVNRKRGGAKKASKENSAHESA                                                                   | 462 | Ccr_R011587        |
| Adelie penguin     | FVKCLEQPVNRKRGGAKKASKENSAHESA                                                                   | 462 | Pad_R007755        |
| Cuckoo roller      | FVKCLEQPVNRKRGGAKKASKENSAHESA                                                                   | 462 | Cdi_R000849        |
| Red-throated loon  | FVKCLEQPVNRKRGGAKKASKENSAHESA                                                                   | 462 | Gst_R001718        |
| American flamingo  | FVKCLEQPVNRKRGGAKKASKENSAHESA                                                                   | 462 | Pru_R009349        |
| Crested ibis       | FVKCLEQPVNRKRGGAKKASKENSAHESA                                                                   | 462 | Nni_R004651        |
| Platypus           | FVKC <b>H</b> D <b>K</b> <b>S</b> L <b>K</b> S <b>P</b> K <b>F</b> L <b>K</b> K <b>T</b> V----- | 454 | ENSOANG00000005949 |
| Human              | FVKC <b>H</b> D <b>K</b> <b>S</b> L <b>N</b> K <b>K</b> S <b>G</b> -----                        | 448 | ENSG00000175445    |
| Mouse              | FVKC <b>H</b> D <b>K</b> <b>S</b> L <b>K</b> K <b>S</b> <b>G</b> -----                          | 447 | ENSMUSG00000015568 |

Avian lipoprotein lipase (LPL) sequences were retrieved by “blasting” the amino acid sequences of chicken LPL (Uniprot P11602), duck LPL (Uniprot U316M2), and flycatcher LPL (U3JR79) against the national avian research facility database (avianbase.narf.ac.uk). In birds, LPL has a 15–amino acid extension when compared to the human LPL sequence. This extension is rich in lysine residues and is highly conserved among birds. Numbers on the top refer to the residue’s position in the human sequence. *Black* residues are perfectly conserved; *orange* residue indicates conservation between amino acids of strongly similar properties; *green* residue indicates conservation between amino acids of weakly similar properties; *blue* residue indicate a non-conservative change.
